# Supplementary material for: A facile colorimetric aptasensor for low-cost chlorpyrifos detection utilizing gold nanoparticle aggregation induced by polyethyleneimine
Source: Royal Society of Chemistry journal article supplement (doi:10.1039/d1an00771h), 2021-01-01
Supplement: d1an00771h1.pdf [file d1an00771h1.pdf]

## Supplementary Information

### **A facile colorimetric aptasensor for low-cost chlorpyrifos detection utilizing gold nanoparticles aggregation induced by polyethyleneimine**

Jittrapun Soongsong<sup>a,b</sup>, Jamras Lerdsri<sup>a,c</sup>, Jaroon Jakmunee<sup>a,d\*</sup>

*<sup>a</sup>Department of Chemistry and Research Laboratory for Analytical Instrument and Electrochemistry Innovation, Faculty of Science, Chiang Mai University, Chiang Mai 50200, Thailand*

*<sup>b</sup>The Graduate School, Chiang Mai University, Chiang Mai 50200, Thailand*

*<sup>c</sup>Veterinary Research and Development Center (Upper Northern Region), Lampang 52190, Thailand*

*<sup>d</sup>Center of Excellence for Innovation in Chemistry, and Research Center on Chemistry for Development of Health Promoting Products from Northern Resources, Faculty of Science, Chiang Mai University, Chiang Mai 50200, Thailand*

\* e-mail: jaroon.jakmunee@cmu.ac.th, jakmunee@gmail.com

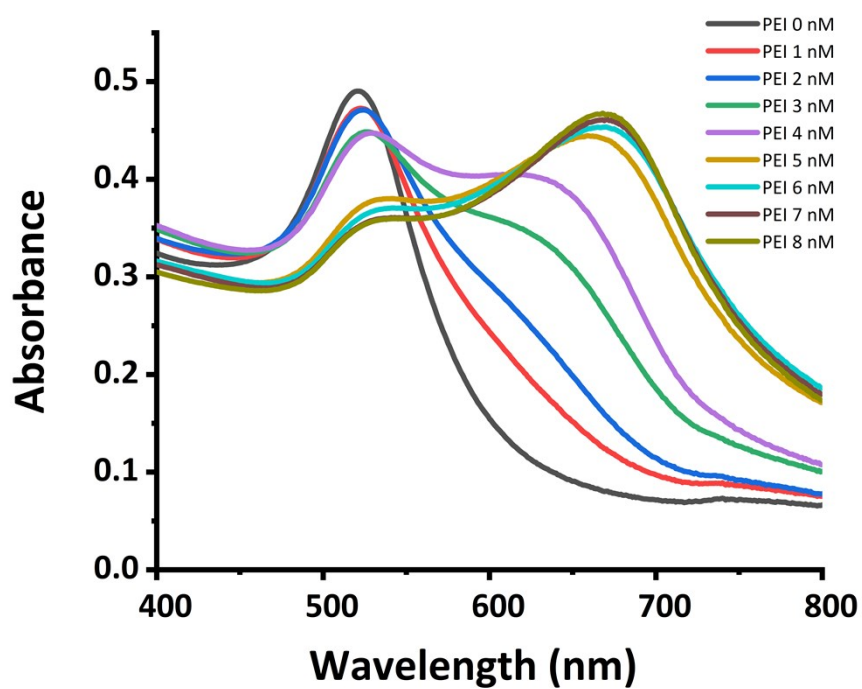

**Fig. S1** UV-Vis absorption spectra of the AuNPs aggregation induced by various concentrations of PEI

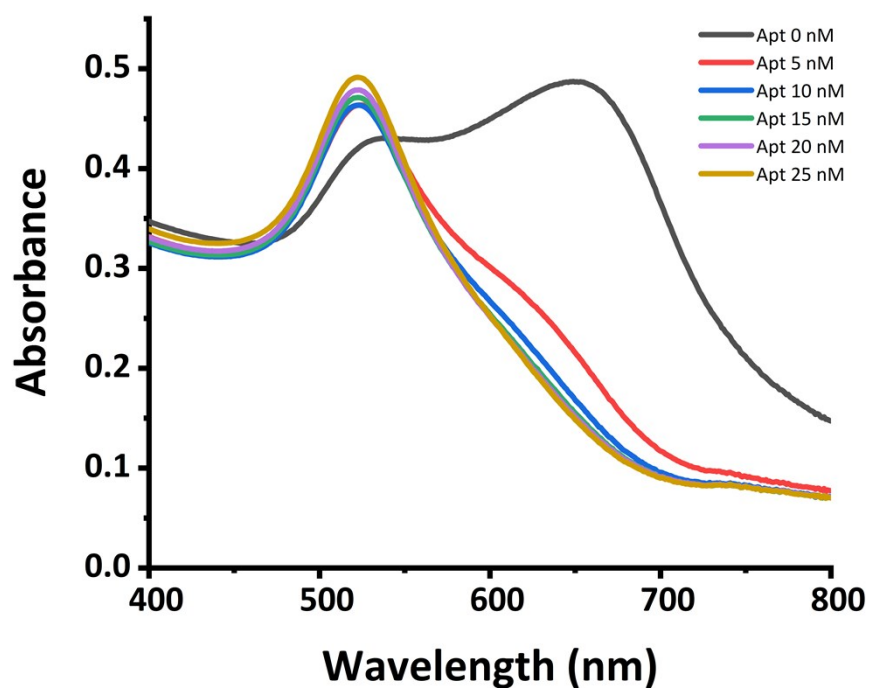

**Fig. S2** UV-Vis absorption spectra of the AuNPs aggregation induced by various concentrations of aptamer (PEI at 6 nM)
